# Supplementary material for: Socialization of Providencia stuartii Enables Resistance to Environmental Insults
Source: MDPI journal article supplement (doi:10.3390/microorganisms10050901), 2022-04-25
Supplement: s1 [file s1]

## **Supplementary Information**

**Socialization of *Providencia stuartii* enables resistance to environmental insults.**

**Authors:**

Julie Lopes<sup>1</sup>, Guillaume Tetreau<sup>1</sup>, Kevin Pounot<sup>1</sup>, Mariam El Khatib<sup>1</sup>, Jacques-Philippe Colletier<sup>1</sup>

**Affiliations:**

<sup>1</sup> Univ. Grenoble Alpes – CEA – CNRS, Institut de Biologie Structurale (IBS), Grenoble, France

Correspondence: colletier@ibs.fr

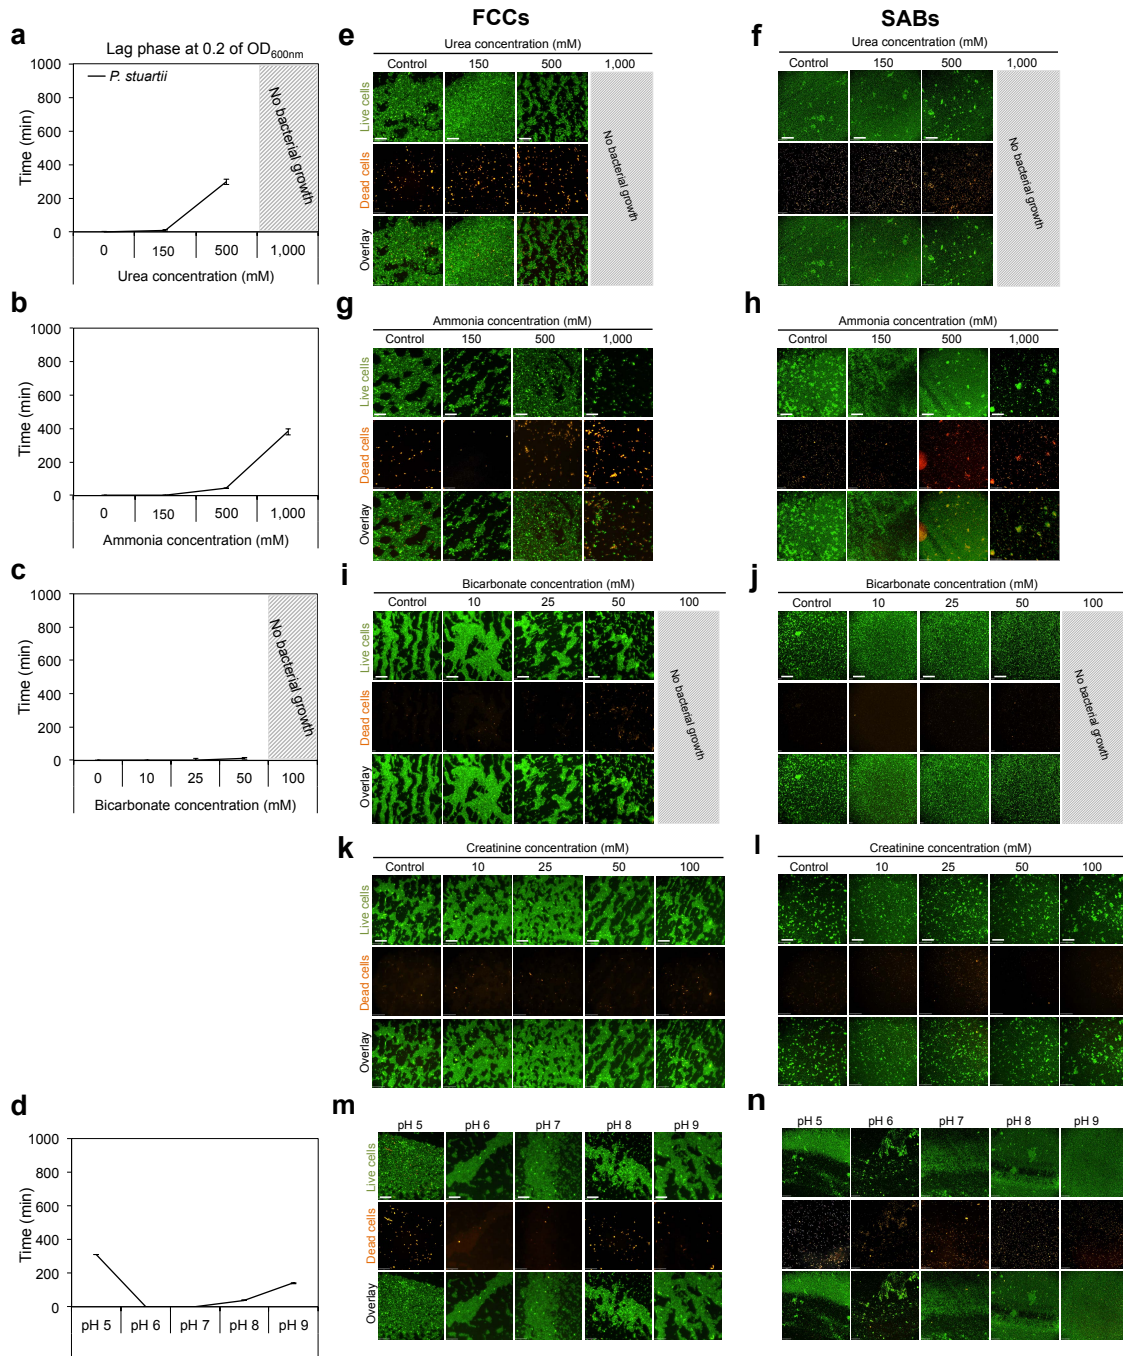

**Supplementary Figure S1. *P. stuartii* is highly resistant to catabolites present in the urinary tract.** (a-d) The overall impact of environmental cues on *P. stuartii* growth was monitored by determining, at increasing concentrations of the cues or pH, the lag time before reaching an optical density of 0.2 at 600 nm. Panels a, b, c, and d show results for urea, ammonia, bicarbonate and for different pH, respectively. All measurements were performed in triplicates; errors bars outline standard deviations from the average. Grey-hatched rectangles indicate concentrations at which bacteria were unable to grow. (e-n) Epifluorescence microscopy was used to monitor FCC (e,g,i,k,m) and SAB formation (f,h,j,l,n) in the presence of urea (e,f), ammonium (g,h), bicarbonate (i,j), creatinine (k,l) and at various pH (m,n). All bacteria are labelled by the permeant DNA stain Syto9 (green channel), but only dead cells are labelled by propidium iodide (red channel). For each condition, an overlay of the two channels is shown. Grey-hatched rectangles indicate concentrations at which bacteria were unable to grow. Scale bars correspond to 50 and 200  $\mu$ m in FCC and SAB micrographs, respectively.

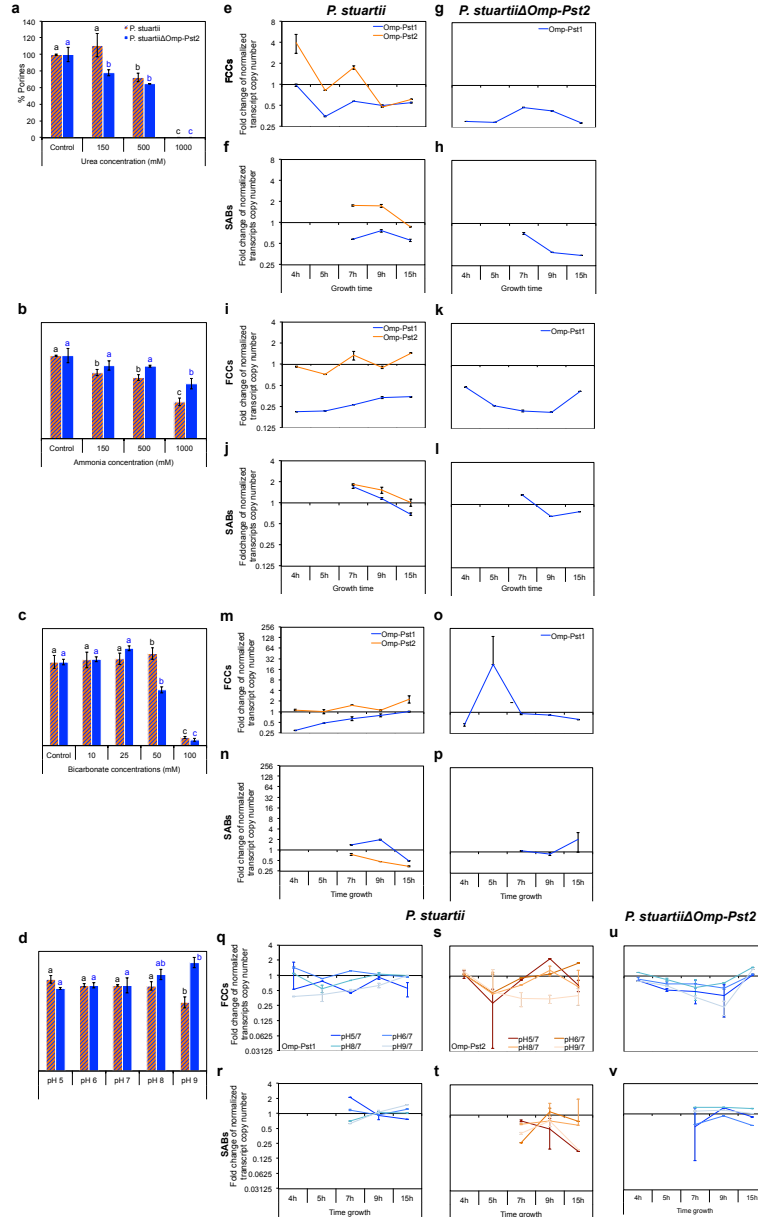

**Supplementary Figure S2. Regulation of porin expression in the presence of environmental cues is more pronounced in FCC than SAB, and sometimes opposed. (a-d)** Porin abundance in the OM of *P. stuartii* FCC and SAB cells grown in presence of increasing concentrations of urea (panel a), ammonia (b), bicarbonate (c) and to various pH (d) was evaluated by image processing of digitized SDS-PAGE gels using ImageJ. Plots show percent increase or decrease in porin abundance in the OM, after normalization of intensity counts from porin bands of exposed bacteria by those of unexposed bacteria. All measurements were performed in triplicates; errors bars outline standard deviations from the average. Different letters above the bars indicate significant differences (p < 0.05; ANOVA followed by post-hoc Tukey HSD test; see statistical indicators in Supplementary Table S1). **(e-v)** Immediate changes in the expression of Omp-Pst1 (blue) and Omp-Pst2 (orange) in WT *P. stuartii* or *P. stuartii*ΔOmp-Pst2 FCCs and SABs cells were monitored by RT-qPCR following 30 min incubation with 500 mM of urea (panels e, f and g, h, respectively), 500 mM ammonia (i, j and k, l), to 50 mM bicarbonate (m, n and o, p), or to pH variation (q, r, s, t and u, v). For each growth time point, we report the ratio of normalized transcript copy numbers between cells exposed and not exposed (control) to the cues. All measurements were performed in triplicates; errors bars outline standard deviations from the average. Different letters above the bars indicate significant differences (p < 0.05; ANOVA followed by post-hoc Tukey HSD test; see statistical indicators in Supplementary Table S2).

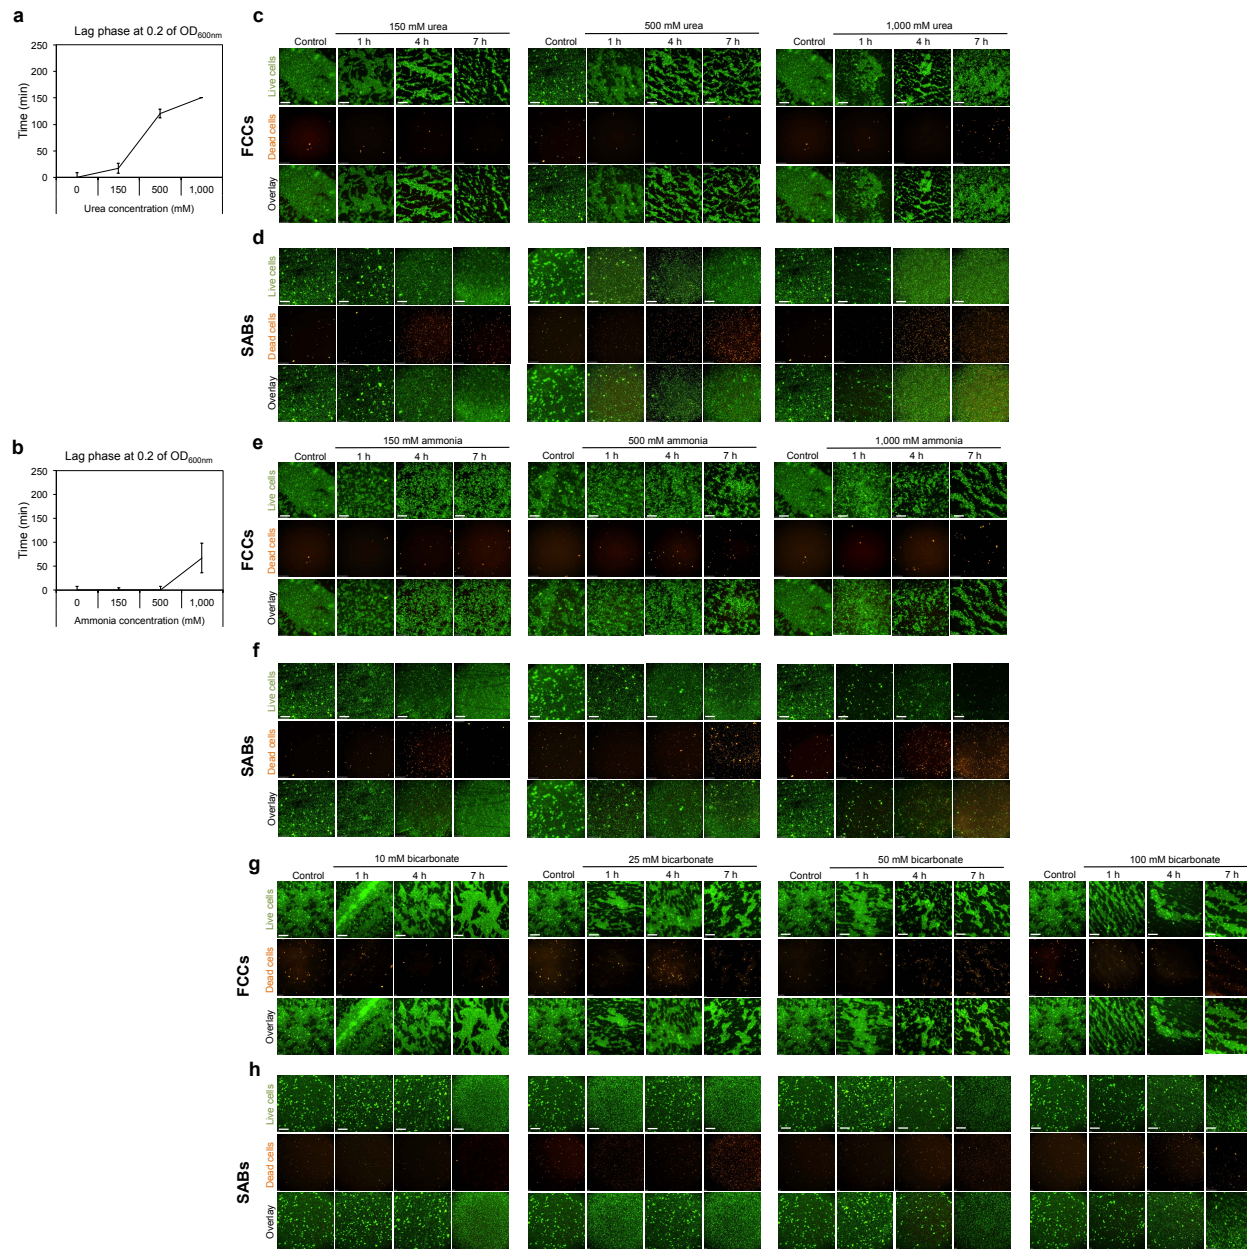

**Supplementary Figure S3. FCC and SAB cells are generally more resistant than their planktonic counterparts.** (a-b) Recovery of preformed *P. stuartii* FCC and SAB cells after sudden exposure to urea (a) or ammonia (b) was monitored by determining, at increasing concentrations of these, the lag time before reaching an optical density of 0.2 at 600 nm. All measurements were performed in triplicates; error bars outline standard deviations from the average. (e-h) Epifluorescence microscopy was used to monitor FCC (e,g,i,k,m) and SAB survival and recovery (f,h,j,l,n) in presence of increasing concentrations of urea (panels c and d, respectively), ammonia (e, f), and bicarbonate (g, h). All bacteria are labelled by the permeant DNA stain Syto9 (green channel), but only dead cells are labelled by propidium iodide (red channel). For each condition, an overlay of the two channels is shown. Grey-hatched rectangles indicate concentrations at which bacteria were unable to grow. Scale bars correspond to 50 and 200  $\mu$ m in FCC and SAB micrographs, respectively. Note that preformed *P. stuartii* FCC and SAB generally resist better to the cues than their developing counterparts, as illustrated by survival of FCC and SAB at 1 M urea and 100 mM bicarbonate, where new cells do not grow (Supplementary Fig. 1). An exception is ammonium, which disrupts SAB formed in its absence although preformed FCC survive and new FCC and SAB can form (Supplementary Fig. 1).



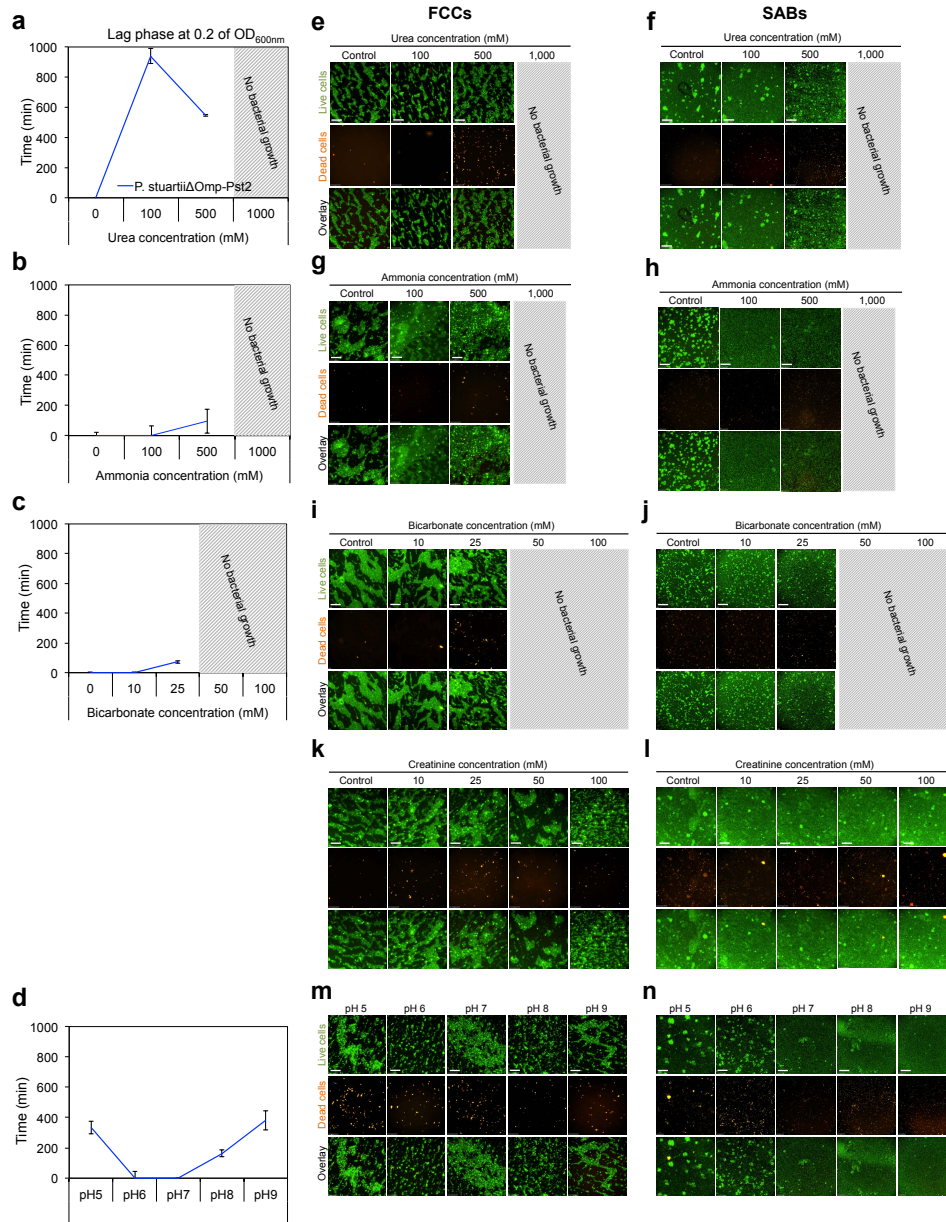

**Supplementary Figure S4. Omp-Pst2 benefits resistance of *P. stuartii* to its pathophysiological environment.** (a-d) The contribution of Omp-Pst2 in adapting to high concentration of urea (a), ammonia (b), bicarbonate (c) or to different pHs (d) was evaluated on the *P. stuartii*ΔOmp-Pst2 strain by determining, at increasing concentrations of the cues or pH, the lag time before reaching an optical density of 0.2 at 600 nm, and comparing results to the wild-type (Supplementary Fig. 1). All measurements were performed in triplicates; errors bars outline standard deviations from the average. Grey-hatched rectangles indicate concentrations at which bacteria were unable to grow. (e-n) Epifluorescence microscopy was used to monitor FCC (e,g,i,k,m) and SAB formation (f,h,j,l,n) by *P. stuartii*ΔOmp-Pst2 cells in the presence of urea (e,f), ammonium (g,h), bicarbonate (i,j), creatinine (k,l) and at various pH (m,n). All bacteria are labelled by the permeant DNA stain Syto9 (green channel), but only dead cells are labelled by propidium iodide (red channel). For each condition, an overlay of the two channels is shown. Grey-hatched rectangles indicate concentrations at which bacteria were unable to grow. Scale bars correspond to 50 and 200 μm in FCC and SAB micrographs, respectively.

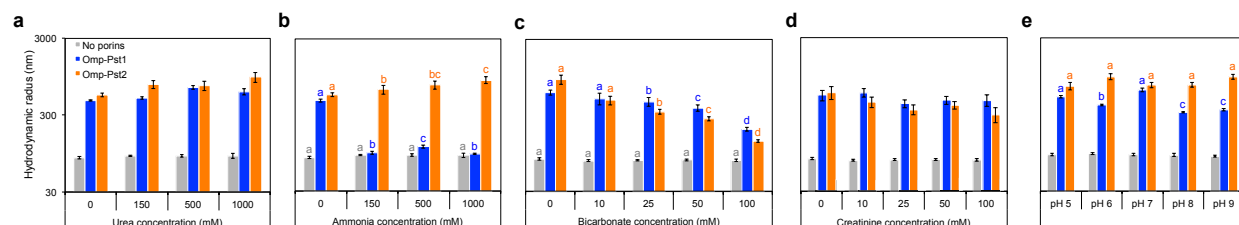

**Supplementary Figure S5. Omp-Pst1 and Omp-Pst2 self-association into DOT can be challenged by environmental cues.** LDAO-solubilized Omp-Pst1 (blue) and Omp-Pst2 (orange) were reconstituted in ~50-nm radius LUV, in presence of increasing concentrations of urea (a), ammonia (b), bicarbonate (c), creatinine (d) or at various pH (e), and after 24 h incubation with biobeads, the hydrodynamic radius of proteoliposomes was measured by DLS. The hydrodynamic radii of LUVs incubated at with the cues but without porin were also measured (grey). Different letters above the bars indicate significant differences ( $p < 0.05$ ; ANOVA followed by post-hoc Tukey HSD test; see statistical indicators in Supplementary Table S3).

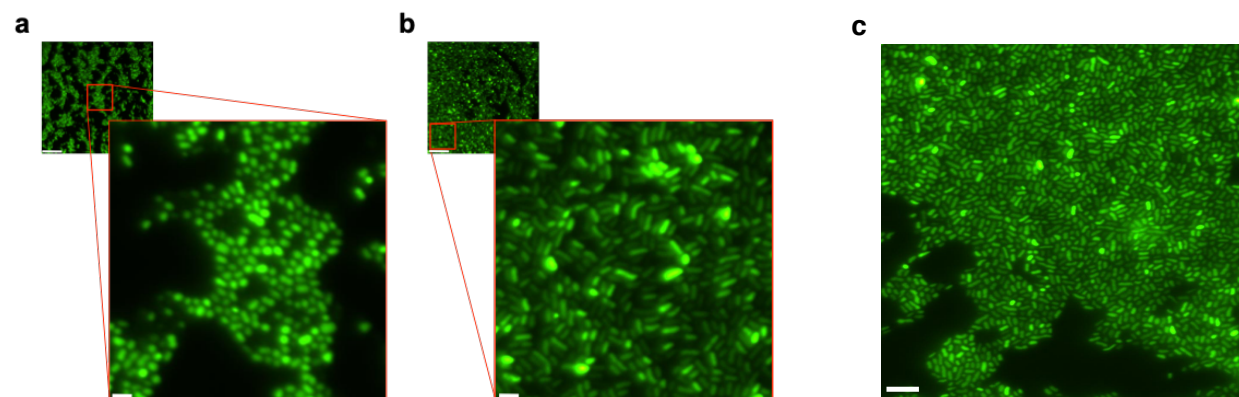

**Supplementary Figure S6. The orientation of *P. stuartii* cells differs in native FCC and in FCC formed in presence of environmental cues.** Close-up views of FCCs developed in the presence of urea (a) and ammonia (b), showing "standing" and "seated" orientations of cells, respectively. (c) Unexposed FCC feature cells in the standing orientation. Epifluorescence microscopy was used to image FCC cells post-labelling by the permeant DNA stain Syto9 (green channel). The scale bars in the small and large panels are 50 µm and 5 µm, respectively.

**Supplementary Table S1 – Statistical analysis from SDS-PAGE gels experiments on porin abundance in OMs.** All experiments were conducted for at least three biologically independent replicates. Technical replicates were averaged to produce replicate means that were subsequently used for analysis. Mean values were compared within and between groups using one-way ANOVA followed by Tukey's post hoc for two-two comparisons. Differences were considered statistically significant if  $p < 0.05$  (True).

### GLM – SDS-PAGE Gels

#### All statistic parameters – *P. stuartii*:

##### Generalized Linear Model Regression Results

```

=====
Dep. Variable:      Y      No. Observations:      39
Model:              GLM    Df Residuals:          35
Model Family:       Gamma  Df Model:            3
Link Function:      inverse_power  Scale:          0.20020
Method:             IRLS   Log-Likelihood:      inf
Date:               Thu, 14 Feb 2019  Deviance:        212.99
Time:               16:59:38  Pearson chi2:    7.01
No. Iterations:     8        Covariance Type:    nonrobust
=====

```

|                  | coef      | std err  | z     | P> z  | [0.025    | 0.975]   |
|------------------|-----------|----------|-------|-------|-----------|----------|
| Intercept        | 0.4455    | 0.395    | 1.129 | 0.259 | -0.328    | 1.219    |
| Urea             | 4.854e-05 | 1.21e-05 | 4.011 | 0.000 | 2.48e-05  | 7.23e-05 |
| Ammonium         | 1.704e-05 | 6.75e-06 | 2.524 | 0.012 | 3.81e-06  | 3.03e-05 |
| Urea:Ammonium    | 8.351e-16 | 7.63e-16 | 1.094 | 0.274 | -6.61e-16 | 2.33e-15 |
| pH               | 0.0362    | 0.057    | 0.638 | 0.523 | -0.075    | 0.147    |
| Urea:pH          | 0.0003    | 8.47e-05 | 4.011 | 0.000 | 0.000     | 0.001    |
| Ammonium:pH      | 0.0001    | 4.73e-05 | 2.524 | 0.012 | 2.67e-05  | 0.000    |
| Urea:Ammonium:pH | 0         | 0        | nan   | nan   | 0         | 0        |

#### Bicarbonate – *P. stuartii*:

##### Generalized Linear Model Regression Results

```

=====
Dep. Variable:      Y      No. Observations:      15
Model:              GLM    Df Residuals:          13
Model Family:       Gamma  Df Model:            1
Link Function:      inverse_power  Scale:          0.29338
Method:             IRLS   Log-Likelihood:    -136.43
Date:               Mon, 20 May 2019  Deviance:        5.1540
Time:               09:29:53  Pearson chi2:    3.81
No. Iterations:     7        Covariance Type:    nonrobust
=====

```

|               | coef      | std err  | z     | P> z  | [0.025   | 0.975]   |
|---------------|-----------|----------|-------|-------|----------|----------|
| Intercept     | 0.0001    | 3.41e-05 | 4.046 | 0.000 | 7.11e-05 | 0.000    |
| Concentration | 3.294e-06 | 1.26e-06 | 2.606 | 0.009 | 8.17e-07 | 5.77e-06 |

#### All statistic parameters – *P. stuartii*ΔOmp-Pst2:

##### Generalized Linear Model Regression Results

```

=====
Dep. Variable:      Values  No. Observations:      39
Model:              GLM    Df Residuals:          35
Model Family:       Gamma  Df Model:            3
Link Function:      inverse_power  Scale:          0.19051
Method:             IRLS   Log-Likelihood:      inf
Date:               Mon, 20 May 2019  Deviance:        212.67
Time:               09:37:42  Pearson chi2:    6.67
No. Iterations:     8        Covariance Type:    nonrobust
=====

```

|           | coef    | std err | z      | P> z  | [0.025    | 0.975] |
|-----------|---------|---------|--------|-------|-----------|--------|
| Intercept | 1.2797  | 0.498   | 2.572  | 0.010 | 0.305     | 2.255  |
| Urea      | 0.0041  | 0.001   | 4.534  | 0.000 | 0.002     | 0.006  |
| Ammonia   | 0.0005  | 0.000   | 1.670  | 0.095 | -9.18e-05 | 0.001  |
| pH        | -0.0586 | 0.069   | -0.855 | 0.392 | -0.193    | 0.076  |

#### Bicarbonate – *P. stuartii*ΔOmp-Pst2:

##### Generalized Linear Model Regression Results

|                 |                  |                   |           |
|-----------------|------------------|-------------------|-----------|
| Dep. Variable:  | Y                | No. Observations: | 15        |
| Model:          | GLM              | Df Residuals:     | 13        |
| Model Family:   | Gamma            | Df Model:         | 1         |
| Link Function:  | inverse_power    | Scale:            | 0.31456   |
| Method:         | IRLS             | Log-Likelihood:   | -133.53   |
| Date:           | Mon, 20 May 2019 | Deviance:         | 7.3202    |
| Time:           | 09:30:46         | Pearson chi2:     | 4.09      |
| No. Iterations: | 7                | Covariance Type:  | nonrobust |

  

|               | coef      | std err  | z     | P> z  | [0.025   | 0.975]   |
|---------------|-----------|----------|-------|-------|----------|----------|
| Intercept     | 0.0001    | 3.93e-05 | 3.569 | 0.000 | 6.33e-05 | 0.000    |
| Concentration | 7.247e-06 | 2.08e-06 | 3.491 | 0.000 | 3.18e-06 | 1.13e-05 |

## 2-2 comparison (Tukey) – *P. stuartii*

### Urea condition:

Multiple Comparison of Means - Tukey HSD,FWER=0.05

| group1 | group2 | meandiff | lower   | upper   | reject |
|--------|--------|----------|---------|---------|--------|
| 0      | 150    | 0.1542   | -0.1792 | 0.4876  | False  |
| 0      | 500    | -0.3759  | -0.7093 | -0.0425 | True   |
| 0      | 1000   | -1.3651  | -1.6985 | -1.0317 | True   |
| 150    | 500    | -0.5301  | -0.8635 | -0.1966 | True   |
| 150    | 1000   | -1.5193  | -1.8527 | -1.1858 | True   |
| 500    | 1000   | -0.9892  | -1.3226 | -0.6558 | True   |

### Ammonia condition:

Multiple Comparison of Means - Tukey HSD,FWER=0.05

| group1 | group2 | meandiff | lower   | upper   | reject |
|--------|--------|----------|---------|---------|--------|
| 0      | 150    | -0.2778  | -0.4343 | -0.1212 | True   |
| 0      | 500    | -0.3618  | -0.5183 | -0.2052 | True   |
| 0      | 1000   | -0.7592  | -0.9157 | -0.6026 | True   |
| 150    | 500    | -0.084   | -0.2405 | 0.0726  | False  |
| 150    | 1000   | -0.4814  | -0.6379 | -0.3248 | True   |
| 500    | 1000   | -0.3974  | -0.5539 | -0.2408 | True   |

### Bicarbonate condition:

Multiple Comparison of Means - Tukey HSD,FWER=0.05

| group1 | group2 | meandiff   | lower      | upper      | reject |
|--------|--------|------------|------------|------------|--------|
| 0      | 10     | 975.8383   | 211.0188   | 1740.6579  | True   |
| 0      | 25     | 756.3667   | -8.4529    | 1521.1862  | False  |
| 0      | 50     | 780.3097   | 15.4901    | 1545.1292  | True   |
| 0      | 100    | -4409.2103 | -5174.0299 | -3644.3908 | True   |
| 10     | 25     | -219.4717  | -984.2912  | 545.3479   | False  |
| 10     | 50     | -195.5287  | -960.3482  | 569.2909   | False  |
| 10     | 100    | -5385.0487 | -6149.8682 | -4620.2291 | True   |
| 25     | 50     | 23.943     | -740.8765  | 788.7625   | False  |
| 25     | 100    | -5165.577  | -5930.3965 | -4400.7575 | True   |
| 50     | 100    | -5189.52   | -5954.3395 | -4424.7005 | True   |

### pH condition:

Multiple Comparison of Means - Tukey HSD,FWER=0.05

| group1 | group2 | meandiff | lower   | upper   | reject |
|--------|--------|----------|---------|---------|--------|
| 5      | 6      | -0.0942  | -0.2838 | 0.0954  | False  |
| 5      | 7      | -0.0976  | -0.2871 | 0.092   | False  |
| 5      | 8      | -0.1051  | -0.2947 | 0.0844  | False  |
| 5      | 9      | -0.3684  | -0.558  | -0.1788 | True   |
| 6      | 7      | -0.0034  | -0.1929 | 0.1862  | False  |
| 6      | 8      | -0.0109  | -0.2005 | 0.1786  | False  |
| 6      | 9      | -0.2742  | -0.4638 | -0.0846 | True   |
| 7      | 8      | -0.0076  | -0.1972 | 0.182   | False  |



|   |   |         |         |         |      |
|---|---|---------|---------|---------|------|
| 7 | 9 | -0.2708 | -0.4604 | -0.0813 | True |
| 8 | 9 | -0.2632 | -0.4528 | -0.0737 | True |

| 2-2 comparison (Tukey) – <i>P. stuartii</i> ΔOmp-Pst2 |        |            |            |            |        |
|-------------------------------------------------------|--------|------------|------------|------------|--------|
| <b>Urea condition:</b>                                |        |            |            |            |        |
| Multiple Comparison of Means - Tukey HSD,FWER=0.05    |        |            |            |            |        |
| =====                                                 |        |            |            |            |        |
| group1                                                | group2 | meandiff   | lower      | upper      | reject |
| -----                                                 |        |            |            |            |        |
| 0                                                     | 150    | -0.2351    | -0.4253    | -0.045     | True   |
| 0                                                     | 500    | -0.3753    | -0.5654    | -0.1851    | True   |
| 0                                                     | 1000   | -1.0683    | -1.2585    | -0.8782    | True   |
| 150                                                   | 500    | -0.1401    | -0.373     | 0.0928     | False  |
| 150                                                   | 1000   | -0.8332    | -1.0661    | -0.6003    | True   |
| 500                                                   | 1000   | -0.6931    | -0.926     | -0.4602    | True   |
| <b>Ammonia condition:</b>                             |        |            |            |            |        |
| Multiple Comparison of Means - Tukey HSD,FWER=0.05    |        |            |            |            |        |
| =====                                                 |        |            |            |            |        |
| group1                                                | group2 | meandiff   | lower      | upper      | reject |
| -----                                                 |        |            |            |            |        |
| 0                                                     | 150    | -0.1283    | -0.3409    | 0.0842     | False  |
| 0                                                     | 500    | -0.135     | -0.3475    | 0.0775     | False  |
| 0                                                     | 1000   | -0.3613    | -0.5738    | -0.1487    | True   |
| 150                                                   | 500    | -0.0066    | -0.2669    | 0.2536     | False  |
| 150                                                   | 1000   | -0.2329    | -0.4932    | 0.0274     | False  |
| 500                                                   | 1000   | -0.2263    | -0.4865    | 0.034      | False  |
| <b>Bicarbonate condition:</b>                         |        |            |            |            |        |
| Multiple Comparison of Means - Tukey HSD,FWER=0.05    |        |            |            |            |        |
| =====                                                 |        |            |            |            |        |
| group1                                                | group2 | meandiff   | lower      | upper      | reject |
| -----                                                 |        |            |            |            |        |
| 0                                                     | 10     | 346.731    | -289.3837  | 982.8457   | False  |
| 0                                                     | 25     | 154.9093   | -481.2053  | 791.024    | False  |
| 0                                                     | 50     | -2002.9833 | -2639.098  | -1366.8687 | True   |
| 0                                                     | 100    | -4633.1367 | -5269.2513 | -3997.022  | True   |
| 10                                                    | 25     | -191.8217  | -827.9363  | 444.293    | False  |
| 10                                                    | 50     | -2349.7143 | -2985.829  | -1713.5997 | True   |
| 10                                                    | 100    | -4979.8677 | -5615.9823 | -4343.753  | True   |
| 25                                                    | 50     | -2157.8927 | -2794.0073 | -1521.778  | True   |
| 25                                                    | 100    | -4788.046  | -5424.1607 | -4151.9313 | True   |
| 50                                                    | 100    | -2630.1533 | -3266.268  | -1994.0387 | True   |
| <b>pH condition:</b>                                  |        |            |            |            |        |
| Multiple Comparison of Means - Tukey HSD,FWER=0.05    |        |            |            |            |        |
| =====                                                 |        |            |            |            |        |
| group1                                                | group2 | meandiff   | lower      | upper      | reject |
| -----                                                 |        |            |            |            |        |
| 5                                                     | 6      | 0.0374     | -0.2237    | 0.2985     | False  |
| 5                                                     | 7      | 0.0388     | -0.1744    | 0.252      | False  |
| 5                                                     | 8      | 0.1749     | -0.0862    | 0.436      | False  |
| 5                                                     | 9      | 0.3246     | 0.0635     | 0.5857     | True   |
| 6                                                     | 7      | 0.0014     | -0.2118    | 0.2146     | False  |
| 6                                                     | 8      | 0.1375     | -0.1236    | 0.3986     | False  |
| 6                                                     | 9      | 0.2872     | 0.0261     | 0.5483     | True   |
| 7                                                     | 8      | 0.1361     | -0.0771    | 0.3493     | False  |
| 7                                                     | 9      | 0.2858     | 0.0726     | 0.499      | True   |
| 8                                                     | 9      | 0.1497     | -0.1114    | 0.4108     | False  |

**Supplementary Table S2 – Statistical analysis from RT-qPCR experiments on porin expression into FCCs and SABs.** All experiments were conducted for at least three biologically independent replicates. Technical replicates were averaged to produce replicate means that were subsequently used for analysis. Mean values were compared within and between groups using one-way ANOVA followed by Tukey's post hoc for two-two comparisons. Differences were considered statistically significant if  $p < 0.05$  (True).

### GLM – RTqPCR – *P. stuartii*

#### Parameter correlations: Urea - Omp-Pst1

| Generalized Linear Model Regression Results |                  |                   |           |       |           |          |
|---------------------------------------------|------------------|-------------------|-----------|-------|-----------|----------|
| Dep. Variable:                              | Y                | No. Observations: | 88        |       |           |          |
| Model:                                      | GLM              | Df Residuals:     | 80        |       |           |          |
| Model Family:                               | Gamma            | Df Model:         | 7         |       |           |          |
| Link Function:                              | inverse_power    | Scale:            | 0.22000   |       |           |          |
| Method:                                     | IRLS             | Log-Likelihood:   | -1032.9   |       |           |          |
| Date:                                       | Tue, 21 May 2019 | Deviance:         | 19.302    |       |           |          |
| Time:                                       | 15:24:28         | Pearson chi2:     | 17.6      |       |           |          |
| No. Iterations:                             | 7                | Covariance Type:  | nonrobust |       |           |          |
|                                             | coef             | std err           | z         | P> z  | [0.025    | 0.975]   |
| Intercept                                   | 1.976e-05        | 4.34e-06          | 4.553     | 0.000 | 1.13e-05  | 2.83e-05 |
| C(Phenotype) [T.Floating]                   | -5.015e-06       | 4.73e-06          | -1.060    | 0.289 | -1.43e-05 | 4.26e-06 |
| Time                                        | -5.654e-07       | 3.72e-07          | -1.518    | 0.129 | -1.3e-06  | 1.64e-07 |
| C(Phenotype) [T.Floating]:Time              | 1.242e-07        | 4.13e-07          | 0.301     | 0.763 | -6.85e-07 | 9.33e-07 |
| Urea                                        | -8.492e-09       | 3.04e-08          | -0.279    | 0.780 | -6.81e-08 | 5.11e-08 |
| C(Phenotype) [T.Floating]:Urea              | 1.565e-08        | 3.27e-08          | 0.478     | 0.632 | -4.85e-08 | 7.98e-08 |
| Time:Urea                                   | 3.323e-09        | 3.17e-09          | 1.049     | 0.294 | -2.89e-09 | 9.53e-09 |
| C(Phenotype) [T.Floating]:Time:Urea         | -1.773e-09       | 3.47e-09          | -0.511    | 0.609 | -8.57e-09 | 5.03e-09 |

#### Parameter correlations: Urea - Omp-Pst2

| Generalized Linear Model Regression Results |                  |                   |           |       |           |          |
|---------------------------------------------|------------------|-------------------|-----------|-------|-----------|----------|
| Dep. Variable:                              | Y                | No. Observations: | 88        |       |           |          |
| Model:                                      | GLM              | Df Residuals:     | 80        |       |           |          |
| Model Family:                               | Gamma            | Df Model:         | 7         |       |           |          |
| Link Function:                              | inverse_power    | Scale:            | 0.78223   |       |           |          |
| Method:                                     | IRLS             | Log-Likelihood:   | -881.32   |       |           |          |
| Date:                                       | Tue, 21 May 2019 | Deviance:         | 56.367    |       |           |          |
| Time:                                       | 15:25:17         | Pearson chi2:     | 62.6      |       |           |          |
| No. Iterations:                             | 8                | Covariance Type:  | nonrobust |       |           |          |
|                                             | coef             | std err           | z         | P> z  | [0.025    | 0.975]   |
| Intercept                                   | 0.0001           | 4.72e-05          | 2.651     | 0.008 | 3.26e-05  | 0.000    |
| C(Phenotype) [T.Floating]                   | 8.957e-05        | 7.12e-05          | 1.257     | 0.209 | -5e-05    | 0.000    |
| Time                                        | -4.41e-06        | 3.91e-06          | -1.127    | 0.260 | -1.21e-05 | 3.26e-06 |
| C(Phenotype) [T.Floating]:Time              | -1.412e-06       | 6.45e-06          | -0.219    | 0.827 | -1.4e-05  | 1.12e-05 |
| Urea                                        | -1.312e-07       | 1.32e-07          | -0.995    | 0.320 | -3.9e-07  | 1.27e-07 |
| C(Phenotype) [T.Floating]:Urea              | -9.149e-08       | 2.12e-07          | -0.431    | 0.666 | -5.08e-07 | 3.25e-07 |
| Time:Urea                                   | 6.08e-09         | 1.15e-08          | 0.530     | 0.596 | -1.64e-08 | 2.86e-08 |
| C(Phenotype) [T.Floating]:Time:Urea         | 1.064e-08        | 2.18e-08          | 0.488     | 0.625 | -3.21e-08 | 5.33e-08 |

#### Parameter correlations: Ammonia - Omp-Pst1

| Generalized Linear Model Regression Results |                  |                   |           |       |           |          |
|---------------------------------------------|------------------|-------------------|-----------|-------|-----------|----------|
| Dep. Variable:                              | Y                | No. Observations: | 89        |       |           |          |
| Model:                                      | GLM              | Df Residuals:     | 81        |       |           |          |
| Model Family:                               | Gamma            | Df Model:         | 7         |       |           |          |
| Link Function:                              | inverse_power    | Scale:            | 0.18900   |       |           |          |
| Method:                                     | IRLS             | Log-Likelihood:   | -1039.4   |       |           |          |
| Date:                                       | Tue, 21 May 2019 | Deviance:         | 15.403    |       |           |          |
| Time:                                       | 15:26:44         | Pearson chi2:     | 15.3      |       |           |          |
| No. Iterations:                             | 7                | Covariance Type:  | nonrobust |       |           |          |
|                                             | coef             | std err           | z         | P> z  | [0.025    | 0.975]   |
| Intercept                                   | 1.976e-05        | 4.02e-06          | 4.913     | 0.000 | 1.19e-05  | 2.76e-05 |
| C(Phenotype) [T.Floating]                   | -5.015e-06       | 4.39e-06          | -1.143    | 0.253 | -1.36e-05 | 3.58e-06 |
| Time                                        | -5.654e-07       | 3.45e-07          | -1.638    | 0.101 | -1.24e-06 | 1.11e-07 |
| C(Phenotype) [T.Floating]:Time              | 1.242e-07        | 3.82e-07          | 0.325     | 0.745 | -6.25e-07 | 8.74e-07 |

|                                         |            |          |        |       |           |           |
|-----------------------------------------|------------|----------|--------|-------|-----------|-----------|
| Ammonium                                | -2.697e-08 | 1.19e-08 | -2.259 | 0.024 | -5.04e-08 | -3.57e-09 |
| C(Phenotype) [T.Floating]:Ammonium      | 8.771e-08  | 2.01e-08 | 4.364  | 0.000 | 4.83e-08  | 1.27e-07  |
| Time:Ammonium                           | 1.78e-09   | 1.11e-09 | 1.601  | 0.109 | -3.99e-10 | 3.96e-09  |
| C(Phenotype) [T.Floating]:Time:Ammonium | -4.559e-09 | 1.8e-09  | -2.530 | 0.011 | -8.09e-09 | -1.03e-09 |

## Parameter correlations: Ammonia - Omp-Pst2

Generalized Linear Model Regression Results

```

=====
Dep. Variable:      Y      No. Observations:      89
Model:              GLM      Df Residuals:          81
Model Family:      Gamma      Df Model:              7
Link Function:      inverse_power      Scale:          0.74485
Method:              IRLS      Log-Likelihood:        -869.64
Date:              Tue, 21 May 2019      Deviance:          51.910
Time:              15:27:33      Pearson chi2:         60.3
No. Iterations:      8      Covariance Type:      nonrobust
=====

```

|                                         | coef       | std err  | z      | P> z  | [0.025    | 0.975]   |
|-----------------------------------------|------------|----------|--------|-------|-----------|----------|
| Intercept                               | 0.0001     | 4.61e-05 | 2.717  | 0.007 | 3.49e-05  | 0.000    |
| C(Phenotype) [T.Floating]               | 8.957e-05  | 6.95e-05 | 1.289  | 0.198 | -4.67e-05 | 0.000    |
| Time                                    | -4.41e-06  | 3.82e-06 | -1.155 | 0.248 | -1.19e-05 | 3.07e-06 |
| C(Phenotype) [T.Floating]:Time          | -1.412e-06 | 6.29e-06 | -0.225 | 0.822 | -1.37e-05 | 1.09e-05 |
| Ammonium                                | 1.805e-07  | 2.8e-07  | 0.644  | 0.520 | -3.69e-07 | 7.3e-07  |
| C(Phenotype) [T.Floating]:Ammonium      | 4.068e-07  | 4.24e-07 | 0.961  | 0.337 | -4.23e-07 | 1.24e-06 |
| Time:Ammonium                           | -5.772e-09 | 2.3e-08  | -0.251 | 0.802 | -5.08e-08 | 3.93e-08 |
| C(Phenotype) [T.Floating]:Time:Ammonium | -3.723e-08 | 3.37e-08 | -1.106 | 0.269 | -1.03e-07 | 2.87e-08 |

## Parameter correlations: Bicarbonate - Omp-Pst1

Generalized Linear Model Regression Results

```

=====
Dep. Variable:      Values      No. Observations:      48
Model:              GLM      Df Residuals:          40
Model Family:      Gamma      Df Model:              7
Link Function:      inverse_power      Scale:          0.28273516624
Method:              IRLS      Log-Likelihood:        -618.86
Date:              Fri, 05 Jul 2019      Deviance:          12.855
Time:              13:51:13      Pearson chi2:         11.3
No. Iterations:      8
=====

```

|                                             | coef       | std err  | z      | P> z  | [95.0% Conf. Int.]  |
|---------------------------------------------|------------|----------|--------|-------|---------------------|
| Intercept                                   | 1.779e-05  | 4.1e-06  | 4.341  | 0.000 | 9.76e-06 2.58e-05   |
| C(Phenotypes) [T.Floating]                  | -1.118e-05 | 4.31e-06 | -2.591 | 0.010 | -1.96e-05 -2.72e-06 |
| Time                                        | -1.128e-06 | 2.75e-07 | -4.098 | 0.000 | -1.67e-06 -5.88e-07 |
| C(Phenotypes) [T.Floating]:Time             | 8.29e-07   | 2.97e-07 | 2.791  | 0.005 | 2.47e-07 1.41e-06   |
| Cconditions                                 | -1.554e-08 | 9.83e-09 | -1.581 | 0.114 | -3.48e-08 3.73e-09  |
| C(Phenotypes) [T.Floating]:Cconditions      | 3.568e-08  | 1.16e-08 | 3.063  | 0.002 | 1.29e-08 5.85e-08   |
| Time:Cconditions                            | 1.162e-09  | 6.73e-10 | 1.728  | 0.084 | -1.56e-10 2.48e-09  |
| C(Phenotypes) [T.Floating]:Time:Cconditions | -2.541e-09 | 8.11e-10 | -3.133 | 0.002 | -4.13e-09 -9.51e-10 |

## Parameter correlations: Bicarbonate - Omp-Pst2

Generalized Linear Model Regression Results

```

=====
Dep. Variable:      Values      No. Observations:      48
Model:              GLM      Df Residuals:          40
Model Family:      Gamma      Df Model:              7
Link Function:      inverse_power      Scale:          0.350373625544
Method:              IRLS      Log-Likelihood:        -516.90
Date:              Fri, 05 Jul 2019      Deviance:          15.804
Time:              14:02:51      Pearson chi2:         14.0
No. Iterations:      7
=====

```

|                                             | coef       | std err  | z      | P> z  | [95.0% Conf. Int.]  |
|---------------------------------------------|------------|----------|--------|-------|---------------------|
| Intercept                                   | 2.502e-05  | 2.08e-05 | 1.204  | 0.229 | -1.57e-05 6.58e-05  |
| C(Phenotypes) [T.Floating]                  | -3.345e-05 | 2.65e-05 | -1.262 | 0.207 | -8.54e-05 1.85e-05  |
| Time                                        | 7.925e-07  | 2.01e-06 | 0.394  | 0.694 | -3.15e-06 4.74e-06  |
| C(Phenotypes) [T.Floating]:Time             | 7.57e-06   | 3.53e-06 | 2.143  | 0.032 | 6.48e-07 1.45e-05   |
| Cconditions                                 | -8.522e-08 | 9.79e-08 | -0.870 | 0.384 | -2.77e-07 1.07e-07  |
| C(Phenotypes) [T.Floating]:Cconditions      | 1.389e-07  | 1.06e-07 | 1.312  | 0.190 | -6.87e-08 3.46e-07  |
| Time:Cconditions                            | 1.602e-08  | 1.1e-08  | 1.452  | 0.146 | -5.6e-09 3.76e-08   |
| C(Phenotypes) [T.Floating]:Time:Cconditions | -2.859e-08 | 1.29e-08 | -2.221 | 0.026 | -5.38e-08 -3.36e-09 |

### Parameter correlations: pH - Omp-Pst1

| Generalized Linear Model Regression Results |                  |                   |           |       |           |          |
|---------------------------------------------|------------------|-------------------|-----------|-------|-----------|----------|
| Dep. Variable:                              | Y                | No. Observations: | 156       |       |           |          |
| Model:                                      | GLM              | Df Residuals:     | 148       |       |           |          |
| Model Family:                               | Gamma            | Df Model:         | 7         |       |           |          |
| Link Function:                              | inverse_power    | Scale:            | 0.29369   |       |           |          |
| Method:                                     | IRLS             | Log-Likelihood:   | -1843.2   |       |           |          |
| Date:                                       | Tue, 21 May 2019 | Deviance:         | 47.729    |       |           |          |
| Time:                                       | 15:29:23         | Pearson chi2:     | 43.5      |       |           |          |
| No. Iterations:                             | 7                | Covariance Type:  | nonrobust |       |           |          |
|                                             | coef             | std err           | z         | P> z  | [0.025    | 0.975]   |
| Intercept                                   | -3.249e-05       | 2.38e-05          | -1.365    | 0.172 | -7.91e-05 | 1.42e-05 |
| C(Phenotype) [T.Floating]                   | 3.936e-05        | 2.59e-05          | 1.522     | 0.128 | -1.13e-05 | 9.01e-05 |
| Time                                        | 3.894e-06        | 2.45e-06          | 1.593     | 0.111 | -8.98e-07 | 8.69e-06 |
| C(Phenotype) [T.Floating]:Time              | -3.441e-06       | 2.61e-06          | -1.317    | 0.188 | -8.56e-06 | 1.68e-06 |
| pH                                          | 7.667e-06        | 3.44e-06          | 2.227     | 0.026 | 9.2e-07   | 1.44e-05 |
| C(Phenotype) [T.Floating]:pH                | -5.688e-06       | 3.74e-06          | -1.523    | 0.128 | -1.3e-05  | 1.63e-06 |
| Time:pH                                     | -6.133e-07       | 3.43e-07          | -1.786    | 0.074 | -1.29e-06 | 5.97e-08 |
| C(Phenotype) [T.Floating]:Time:pH           | 4.35e-07         | 3.67e-07          | 1.186     | 0.236 | -2.84e-07 | 1.15e-06 |

### Parameter correlations: pH - Omp-Pst2

| Generalized Linear Model Regression Results |                  |                   |           |       |           |          |
|---------------------------------------------|------------------|-------------------|-----------|-------|-----------|----------|
| Dep. Variable:                              | Y                | No. Observations: | 155       |       |           |          |
| Model:                                      | GLM              | Df Residuals:     | 147       |       |           |          |
| Model Family:                               | Gamma            | Df Model:         | 7         |       |           |          |
| Link Function:                              | inverse_power    | Scale:            | 0.90306   |       |           |          |
| Method:                                     | IRLS             | Log-Likelihood:   | -1510.8   |       |           |          |
| Date:                                       | Tue, 21 May 2019 | Deviance:         | 112.64    |       |           |          |
| Time:                                       | 15:28:36         | Pearson chi2:     | 133.      |       |           |          |
| No. Iterations:                             | 8                | Covariance Type:  | nonrobust |       |           |          |
|                                             | coef             | std err           | z         | P> z  | [0.025    | 0.975]   |
| Intercept                                   | 6.154e-05        | 0.000             | 0.222     | 0.825 | -0.000    | 0.001    |
| C(Phenotype) [T.Floating]                   | 0.0002           | 0.000             | 0.511     | 0.609 | -0.001    | 0.001    |
| Time                                        | 2.285e-06        | 2.74e-05          | 0.083     | 0.934 | -5.14e-05 | 5.6e-05  |
| C(Phenotype) [T.Floating]:Time              | -2.104e-05       | 3.64e-05          | -0.578    | 0.563 | -9.23e-05 | 5.03e-05 |
| pH                                          | 1.1e-05          | 3.96e-05          | 0.278     | 0.781 | -6.65e-05 | 8.85e-05 |
| C(Phenotype) [T.Floating]:pH                | -1.724e-05       | 5.17e-05          | -0.334    | 0.739 | -0.000    | 8.4e-05  |
| Time:pH                                     | -7.931e-07       | 3.88e-06          | -0.204    | 0.838 | -8.4e-06  | 6.82e-06 |
| C(Phenotype) [T.Floating]:Time:pH           | 3.284e-06        | 5.26e-06          | 0.624     | 0.532 | -7.02e-06 | 1.36e-05 |

### GLM – RTqPCR – *P. stuartii*ΔOmp-Pst2

#### Parameter correlations: Urea

| Generalized Linear Model Regression Results |                  |                   |           |       |           |          |
|---------------------------------------------|------------------|-------------------|-----------|-------|-----------|----------|
| Dep. Variable:                              | Y                | No. Observations: | 96        |       |           |          |
| Model:                                      | GLM              | Df Residuals:     | 88        |       |           |          |
| Model Family:                               | Gamma            | Df Model:         | 7         |       |           |          |
| Link Function:                              | inverse_power    | Scale:            | 0.20053   |       |           |          |
| Method:                                     | IRLS             | Log-Likelihood:   | -1144.3   |       |           |          |
| Date:                                       | Tue, 21 May 2019 | Deviance:         | 19.798    |       |           |          |
| Time:                                       | 16:17:17         | Pearson chi2:     | 17.6      |       |           |          |
| No. Iterations:                             | 8                | Covariance Type:  | nonrobust |       |           |          |
|                                             | coef             | std err           | z         | P> z  | [0.025    | 0.975]   |
| Intercept                                   | 5.906e-06        | 2.35e-06          | 2.509     | 0.012 | 1.29e-06  | 1.05e-05 |
| C(Phenotype) [T.Floating]                   | 1.85e-06         | 2.72e-06          | 0.681     | 0.496 | -3.48e-06 | 7.18e-06 |
| Time                                        | 2.43e-07         | 2.34e-07          | 1.038     | 0.299 | -2.16e-07 | 7.02e-07 |
| C(Phenotype) [T.Floating]:Time              | -7.038e-08       | 2.84e-07          | -0.248    | 0.804 | -6.26e-07 | 4.86e-07 |
| Urea                                        | -5.05e-08        | 2.39e-08          | -2.115    | 0.034 | -9.73e-08 | -3.7e-09 |
| C(Phenotype) [T.Floating]:Urea              | 6.131e-08        | 2.77e-08          | 2.215     | 0.027 | 7.06e-09  | 1.16e-07 |
| Time:Urea                                   | 8.384e-09        | 2.96e-09          | 2.835     | 0.005 | 2.59e-09  | 1.42e-08 |
| C(Phenotype) [T.Floating]:Time:Urea         | -5.163e-09       | 3.54e-09          | -1.459    | 0.144 | -1.21e-08 | 1.77e-09 |

### Parameter correlations: Ammonia

| Generalized Linear Model Regression Results |                  |                   |           |       |           |          |
|---------------------------------------------|------------------|-------------------|-----------|-------|-----------|----------|
| =====                                       |                  |                   |           |       |           |          |
| Dep. Variable:                              | Y                | No. Observations: | 96        |       |           |          |
| Model:                                      | GLM              | Df Residuals:     | 88        |       |           |          |
| Model Family:                               | Gamma            | Df Model:         | 7         |       |           |          |
| Link Function:                              | inverse_power    | Scale:            | 0.15986   |       |           |          |
| Method:                                     | IRLS             | Log-Likelihood:   | -1145.4   |       |           |          |
| Date:                                       | Tue, 21 May 2019 | Deviance:         | 15.809    |       |           |          |
| Time:                                       | 16:18:11         | Pearson chi2:     | 14.1      |       |           |          |
| No. Iterations:                             | 7                | Covariance Type:  | nonrobust |       |           |          |
| =====                                       |                  |                   |           |       |           |          |
|                                             | coef             | std err           | z         | P> z  | [0.025    | 0.975]   |
| -----                                       |                  |                   |           |       |           |          |
| Intercept                                   | 5.906e-06        | 2.1e-06           | 2.810     | 0.005 | 1.79e-06  | 1e-05    |
| C(Phenotype) [T.Floating]                   | 1.85e-06         | 2.43e-06          | 0.763     | 0.446 | -2.91e-06 | 6.61e-06 |
| Time                                        | 2.43e-07         | 2.09e-07          | 1.162     | 0.245 | -1.67e-07 | 6.53e-07 |
| C(Phenotype) [T.Floating]:Time              | -7.038e-08       | 2.53e-07          | -0.278    | 0.781 | -5.67e-07 | 4.26e-07 |
| Ammonium                                    | -7.175e-09       | 7.82e-09          | -0.918    | 0.359 | -2.25e-08 | 8.14e-09 |
| C(Phenotype) [T.Floating]:Ammonium          | 5.693e-08        | 1.47e-08          | 3.863     | 0.000 | 2.8e-08   | 8.58e-08 |
| Time:Ammonium                               | 5.944e-10        | 8.13e-10          | 0.731     | 0.465 | -9.98e-10 | 2.19e-09 |
| C(Phenotype) [T.Floating]:Time:Ammonium     | -2.649e-09       | 1.48e-09          | -1.785    | 0.074 | -5.56e-09 | 2.59e-10 |
| =====                                       |                  |                   |           |       |           |          |

### Parameter correlations: Bicarbonate

| Generalized Linear Model Regression Results |                  |                   |               |       |                    |          |
|---------------------------------------------|------------------|-------------------|---------------|-------|--------------------|----------|
| =====                                       |                  |                   |               |       |                    |          |
| Dep. Variable:                              | Values           | No. Observations: | 48            |       |                    |          |
| Model:                                      | GLM              | Df Residuals:     | 40            |       |                    |          |
| Model Family:                               | Gamma            | Df Model:         | 7             |       |                    |          |
| Link Function:                              | inverse_power    | Scale:            | 1.13895772977 |       |                    |          |
| Method:                                     | IRLS             | Log-Likelihood:   | -612.73       |       |                    |          |
| Date:                                       | Fri, 05 Jul 2019 | Deviance:         | 30.400        |       |                    |          |
| Time:                                       | 15:15:31         | Pearson chi2:     | 45.6          |       |                    |          |
| No. Iterations:                             | 9                |                   |               |       |                    |          |
| =====                                       |                  |                   |               |       |                    |          |
|                                             | coef             | std err           | z             | P> z  | [95.0% Conf. Int.] |          |
| -----                                       |                  |                   |               |       |                    |          |
| Intercept                                   | 3.441e-05        | 1.61e-05          | 2.135         | 0.033 | 2.83e-06           | 6.6e-05  |
| C(Phenotypes) [T.Floating]                  | -2.833e-06       | 1.91e-05          | -0.148        | 0.882 | -4.03e-05          | 3.46e-05 |
| Time                                        | -2.157e-06       | 1.09e-06          | -1.988        | 0.047 | -4.28e-06          | -3e-08   |
| C(Phenotypes) [T.Floating]:Time             | 1.842e-07        | 1.29e-06          | 0.143         | 0.886 | -2.34e-06          | 2.71e-06 |
| Cconditions                                 | 8.339e-09        | 4.73e-08          | 0.176         | 0.860 | -8.43e-08          | 1.01e-07 |
| C(Phenotypes) [T.Floating]:Cconditions      | -5.474e-08       | 5.21e-08          | -1.051        | 0.293 | -1.57e-07          | 4.74e-08 |
| Time:Cconditions                            | -7.075e-10       | 3.17e-09          | -0.223        | 0.823 | -6.92e-09          | 5.51e-09 |
| C(Phenotypes) [T.Floating]:Time:Cconditions | 4.06e-09         | 3.53e-09          | 1.149         | 0.250 | -2.86e-09          | 1.1e-08  |
| =====                                       |                  |                   |               |       |                    |          |

### Parameter correlations: pH

| Generalized Linear Model Regression Results |                  |                   |           |       |           |          |
|---------------------------------------------|------------------|-------------------|-----------|-------|-----------|----------|
| =====                                       |                  |                   |           |       |           |          |
| Dep. Variable:                              | Y                | No. Observations: | 168       |       |           |          |
| Model:                                      | GLM              | Df Residuals:     | 160       |       |           |          |
| Model Family:                               | Gamma            | Df Model:         | 7         |       |           |          |
| Link Function:                              | inverse_power    | Scale:            | 0.21959   |       |           |          |
| Method:                                     | IRLS             | Log-Likelihood:   | -2016.9   |       |           |          |
| Date:                                       | Tue, 21 May 2019 | Deviance:         | 34.902    |       |           |          |
| Time:                                       | 16:19:02         | Pearson chi2:     | 35.1      |       |           |          |
| No. Iterations:                             | 7                | Covariance Type:  | nonrobust |       |           |          |
| =====                                       |                  |                   |           |       |           |          |
|                                             | coef             | std err           | z         | P> z  | [0.025    | 0.975]   |
| -----                                       |                  |                   |           |       |           |          |
| Intercept                                   | 1.953e-05        | 1.05e-05          | 1.856     | 0.063 | -1.1e-06  | 4.02e-05 |
| C(Phenotype) [T.Floating]                   | -9.239e-06       | 1.27e-05          | -0.725    | 0.468 | -3.42e-05 | 1.57e-05 |
| Time                                        | -2.693e-07       | 1.01e-06          | -0.266    | 0.790 | -2.25e-06 | 1.71e-06 |
| C(Phenotype) [T.Floating]:Time              | 5.56e-07         | 1.27e-06          | 0.436     | 0.663 | -1.94e-06 | 3.05e-06 |
| pH                                          | -1.726e-06       | 1.41e-06          | -1.222    | 0.222 | -4.49e-06 | 1.04e-06 |
| C(Phenotype) [T.Floating]:pH                | 2.052e-06        | 1.73e-06          | 1.183     | 0.237 | -1.35e-06 | 5.45e-06 |
| Time:pH                                     | 6.412e-08        | 1.37e-07          | 0.469     | 0.639 | -2.04e-07 | 3.32e-07 |
| C(Phenotype) [T.Floating]:Time:pH           | -1.241e-07       | 1.74e-07          | -0.712    | 0.476 | -4.66e-07 | 2.17e-07 |
| =====                                       |                  |                   |           |       |           |          |

### 2-2 comparison (Tukey) - Urea condition – *P. stuartii*

#### Omp-Pst1 porin – FCCs

Multiple Comparison of Means - Tukey HSD,FWER=0.05



| =====                                                                                |        |             |              |              |             |       |
|--------------------------------------------------------------------------------------|--------|-------------|--------------|--------------|-------------|-------|
| group1                                                                               | group2 | meandiff    | lower        | upper        | reject      |       |
| 4h                                                                                   | 0      | 500         | 16574.1498   | -30452.3034  | 63600.6031  | False |
| 5h                                                                                   | 0      | 500         | -38902.0202  | -69962.3523  | -7841.6881  | True  |
| 7h                                                                                   | 0      | 500         | -71189.8961  | -123737.1743 | -18642.618  | True  |
| 9h                                                                                   | 0      | 500         | -63057.0912  | -127634.1388 | 1519.9565   | True  |
| 15h                                                                                  | 0      | 500         | -63286.2712  | -114749.5456 | -11822.9968 | True  |
| <b>Omp-Pst2 porin – FCCs</b>                                                         |        |             |              |              |             |       |
| Multiple Comparison of Means - Tukey HSD,FWER=0.05                                   |        |             |              |              |             |       |
| =====                                                                                |        |             |              |              |             |       |
| group1                                                                               | group2 | meandiff    | lower        | upper        | reject      |       |
| 4h                                                                                   | 0      | 500         | 6261.4946    | 1996.197     | 10526.7923  | True  |
| 5h                                                                                   | 0      | 500         | -2134.6555   | -12996.94    | 8727.629    | False |
| 7h                                                                                   | 0      | 500         | 7521.8879    | 1598.1456    | 13445.6302  | True  |
| 9h                                                                                   | 0      | 500         | -657.2522    | -10717.0073  | 9402.5029   | False |
| 15h                                                                                  | 0      | 500         | -539.4299    | -9813.6084   | 8734.7485   | False |
| <b>2-2 comparison (Tukey) - Urea condition – <i>P. stuartii</i> – According Time</b> |        |             |              |              |             |       |
| <b>Omp-Pst1 porin – FCCs</b>                                                         |        |             |              |              |             |       |
| Multiple Comparison of Means - Tukey HSD,FWER=0.05                                   |        |             |              |              |             |       |
| =====                                                                                |        |             |              |              |             |       |
| group1                                                                               | group2 | meandiff    | lower        | upper        | reject      |       |
| 4                                                                                    | 5      | -69510.7473 | -90915.2466  | -48106.248   | True        |       |
| 4                                                                                    | 7      | -30288.1114 | -51692.6107  | -8883.6121   | True        |       |
| 4                                                                                    | 9      | -47009.2685 | -68413.7677  | -25604.7692  | True        |       |
| 4                                                                                    | 15     | -35263.6879 | -56668.1872  | -13859.1886  | True        |       |
| 5                                                                                    | 7      | 39222.6359  | 17818.1367   | 60627.1352   | True        |       |
| 5                                                                                    | 9      | 22501.4789  | 1096.9796    | 43905.9781   | True        |       |
| 5                                                                                    | 15     | 34247.0594  | 12842.5601   | 55651.5587   | True        |       |
| 7                                                                                    | 9      | -16721.1571 | -38125.6564  | 4683.3422    | False       |       |
| 7                                                                                    | 15     | -4975.5765  | -26380.0758  | 16428.9228   | False       |       |
| 9                                                                                    | 15     | 11745.5806  | -9658.9187   | 33150.0798   | False       |       |
| <b>2-2 comparison (Tukey) – Ammonia condition – <i>P. stuartii</i></b>               |        |             |              |              |             |       |
| <b>Omp-Pst1 porin – FCCs</b>                                                         |        |             |              |              |             |       |
| Multiple Comparison of Means - Tukey HSD,FWER=0.05                                   |        |             |              |              |             |       |
| =====                                                                                |        |             |              |              |             |       |
| group1                                                                               | group2 | meandiff    | lower        | upper        | reject      |       |
| 4H                                                                                   | 0      | 500         | -48214.2397  | -94654.66    | -1773.8194  | True  |
| 5H                                                                                   | 0      | 500         | -35184.7269  | -66101.6521  | -4267.8018  | True  |
| 7H                                                                                   | 0      | 500         | -80993.2267  | -134113.1314 | -27873.3221 | True  |
| 9H                                                                                   | 0      | 500         | -54354.4792  | -118532.4498 | 9823.4914   | True  |
| 15H                                                                                  | 0      | 500         | -63325.4663  | -115029.2888 | -11621.6438 | True  |
| <b>Omp-Pst1 porin – SABs</b>                                                         |        |             |              |              |             |       |
| Multiple Comparison of Means - Tukey HSD,FWER=0.05                                   |        |             |              |              |             |       |
| =====                                                                                |        |             |              |              |             |       |
| group1                                                                               | group2 | meandiff    | lower        | upper        | reject      |       |
| 7H                                                                                   | 0      | 500         | 51763.2687   | 13226.7333   | 90299.804   | True  |
| 9H                                                                                   | 0      | 500         | 44588.3453   | -2241.4323   | 91418.123   | False |
| 15H                                                                                  | 0      | 500         | 122.8988     | -69268.6729  | 69514.4706  | False |
| <b>2-2 comparison (Tukey) – Bicarbonate condition – <i>P. stuartii</i></b>           |        |             |              |              |             |       |
| <b>Omp-Pst1 porin – FCCs</b>                                                         |        |             |              |              |             |       |
| Multiple Comparison of Means - Tukey HSD,FWER=0.05                                   |        |             |              |              |             |       |
| =====                                                                                |        |             |              |              |             |       |
| group1                                                                               | group2 | meandiff    | lower        | upper        | reject      |       |
| 4h                                                                                   | 0      | 50          | -252343.4867 | -407839.5819 | -96847.3915 | True  |
| 5h                                                                                   | 0      | 50          | -54122.7379  | -107260.2379 | -985.2379   | True  |
| 7h                                                                                   | 0      | 50          | -53049.4907  | -161346.8928 | 55247.9113  | False |
| 9h                                                                                   | 0      | 50          | -37971.1624  | -256101.1496 | 180158.8249 | False |
| 15h                                                                                  | 0      | 50          | 5929.5254    | -256043.3444 | 267902.3952 | False |

## Omp-Pst2 porin – FCCs

Multiple Comparison of Means - Tukey HSD, FWER=0.05

|     | group1 | group2 | meandiff   | lower       | upper      | reject |
|-----|--------|--------|------------|-------------|------------|--------|
| 4h  | 0      | 50     | 6895.8395  | -59887.8827 | 73679.5616 | False  |
| 5h  | 0      | 50     | 345.2546   | -17834.8625 | 18525.3718 | False  |
| 7h  | 0      | 50     | 11245.2606 | -8163.8192  | 30654.3404 | False  |
| 9h  | 0      | 50     | 877.444    | -9994.3841  | 11749.2721 | False  |
| 15h | 0      | 50     | 16834.8001 | 595.501     | 33074.0991 | True   |

## 2-2 comparison (Tukey) – pH condition – *P. stuartii*

### Omp-Pst1 porin – FCCs

#### 4h:

Multiple Comparison of Means - Tukey HSD, FWER=0.05

| group1 | group2 | meandiff    | lower       | upper       | reject |
|--------|--------|-------------|-------------|-------------|--------|
| 5      | 6      | 30203.4498  | -33493.5242 | 93900.4238  | False  |
| 5      | 7      | 49864.7744  | -2949.9663  | 102679.5152 | False  |
| 5      | 8      | 18929.9289  | -44767.0451 | 82626.9029  | False  |
| 5      | 9      | -5065.2398  | -68762.2138 | 58631.7342  | False  |
| 6      | 7      | 19661.3246  | -33153.4161 | 72476.0654  | False  |
| 6      | 8      | -11273.5209 | -74970.4949 | 52423.4531  | False  |
| 6      | 9      | -35268.6896 | -98965.6636 | 28428.2843  | False  |
| 7      | 8      | -30934.8455 | -83749.5863 | 21879.8952  | False  |
| 7      | 9      | -54930.0143 | -107744.755 | -2115.2735  | True   |
| 8      | 9      | -23995.1687 | -87692.1427 | 39701.8052  | False  |

#### 5h:

Multiple Comparison of Means - Tukey HSD, FWER=0.05

| group1 | group2 | meandiff    | lower       | upper      | reject |
|--------|--------|-------------|-------------|------------|--------|
| 5      | 6      | 4324.7478   | -35825.5557 | 44475.0512 | False  |
| 5      | 7      | 19422.9899  | -13867.883  | 52713.8628 | False  |
| 5      | 8      | -9858.4211  | -50008.7245 | 30291.8823 | False  |
| 5      | 9      | -15480.8529 | -55631.1564 | 24669.4505 | False  |
| 6      | 7      | 15098.2422  | -18192.6308 | 48389.1151 | False  |
| 6      | 8      | -14183.1688 | -54333.4722 | 25967.1346 | False  |
| 6      | 9      | -19805.6007 | -59955.9041 | 20344.7027 | False  |
| 7      | 8      | -29281.411  | -62572.2839 | 4009.4619  | False  |
| 7      | 9      | -34903.8429 | -68194.7158 | -1612.9699 | True   |
| 8      | 9      | -5622.4319  | -45772.7353 | 34527.8716 | False  |

#### 7h:

Multiple Comparison of Means - Tukey HSD, FWER=0.05

| group1 | group2 | meandiff    | lower        | upper       | reject |
|--------|--------|-------------|--------------|-------------|--------|
| 5      | 6      | 83222.8583  | 9312.0111    | 157133.7054 | True   |
| 5      | 7      | 77210.3097  | 15926.6727   | 138493.9467 | True   |
| 5      | 8      | 37275.7864  | -36635.0608  | 111186.6335 | False  |
| 5      | 9      | 6370.9945   | -67539.8527  | 80281.8416  | False  |
| 6      | 7      | -6012.5486  | -67296.1855  | 55271.0884  | False  |
| 6      | 8      | -45947.0719 | -119857.919  | 27963.7752  | False  |
| 6      | 9      | -76851.8638 | -150762.7109 | -2941.0167  | True   |
| 7      | 8      | -39934.5233 | -101218.1603 | 21349.1136  | False  |
| 7      | 9      | -70839.3152 | -132122.9522 | -9555.6783  | True   |
| 8      | 9      | -30904.7919 | -104815.639  | 43006.0552  | False  |

### Omp-Pst1 porin – SABs

#### 7h:

| Multiple Comparison of Means - Tukey HSD,FWER=0.05 |        |             |              |             |        |  |
|----------------------------------------------------|--------|-------------|--------------|-------------|--------|--|
| group1                                             | group2 | meandiff    | lower        | upper       | reject |  |
| 5                                                  | 6      | -26759.8469 | -78909.5474  | 25389.8536  | False  |  |
| 5                                                  | 7      | -33941.5292 | -76521.5814  | 8638.5229   | False  |  |
| 5                                                  | 8      | -66739.4717 | -118889.1722 | -14589.7711 | True   |  |
| 5                                                  | 9      | -70736.6287 | -122886.3292 | -18586.9282 | True   |  |
| 6                                                  | 7      | -7181.6824  | -49761.7345  | 35398.3698  | False  |  |
| 6                                                  | 8      | -39979.6248 | -92129.3253  | 12170.0757  | False  |  |
| 6                                                  | 9      | -43976.7818 | -96126.4823  | 8172.9187   | False  |  |
| 7                                                  | 8      | -32797.9424 | -75377.9946  | 9782.1098   | False  |  |
| 7                                                  | 9      | -36795.0995 | -79375.1516  | 5784.9527   | False  |  |
| 8                                                  | 9      | -3997.157   | -56146.8576  | 48152.5435  | False  |  |

| 2-2 comparison (Tukey) - Urea condition – <i>P. stuartii</i> ΔOmp-Pst2 |        |          |             |              |             |      |
|------------------------------------------------------------------------|--------|----------|-------------|--------------|-------------|------|
| Omp-Pst1 porin – FCCs                                                  |        |          |             |              |             |      |
| Multiple Comparison of Means - Tukey HSD,FWER=0.05                     |        |          |             |              |             |      |
| group1                                                                 | group2 | meandiff | lower       | upper        | reject      |      |
| 4h                                                                     | 0      | 500      | -48814.8603 | -79244.6239  | -18385.0967 | True |
| 5h                                                                     | 0      | 500      | -79571.3733 | -112223.3454 | -46919.4013 | True |
| 7h                                                                     | 0      | 500      | -84041.5601 | -146780.2218 | -21302.8985 | True |
| 9h                                                                     | 0      | 500      | -80294.8613 | -120605.1033 | -39984.6194 | True |
| 15h                                                                    | 0      | 500      | -66788.6326 | -124584.7873 | -8992.4779  | True |

  

| Multiple Comparison of Means - Tukey HSD,FWER=0.05 |        |          |             |              |            |       |
|----------------------------------------------------|--------|----------|-------------|--------------|------------|-------|
| group1                                             | group2 | meandiff | lower       | upper        | reject     |       |
| 7h                                                 | 0      | 500      | -51532.3838 | -131390.0291 | 28325.2614 | False |
| 9h                                                 | 0      | 500      | -67561.3871 | -143722.56   | 8599.7859  | False |
| 15h                                                | 0      | 500      | -85432.9544 | -138213.5268 | -32652.382 | True  |

| 2-2 comparison (Tukey) – Ammonia condition – <i>P. stuartii</i> ΔOmp-Pst2 |        |          |              |              |             |      |
|---------------------------------------------------------------------------|--------|----------|--------------|--------------|-------------|------|
| Omp-Pst1 porin – FCC                                                      |        |          |              |              |             |      |
| Multiple Comparison of Means - Tukey HSD,FWER=0.05                        |        |          |              |              |             |      |
| group1                                                                    | group2 | meandiff | lower        | upper        | reject      |      |
| 4h                                                                        | 0      | 500      | -40754.5817  | -70288.9453  | -11220.2181 | True |
| 5h                                                                        | 0      | 500      | -79073.6582  | -112314.5001 | -45832.8162 | True |
| 7h                                                                        | 0      | 500      | -104908.034  | -169132.0224 | -40684.0456 | True |
| 9h                                                                        | 0      | 500      | -108527.7472 | -148262.142  | -68793.3525 | True |
| 15h                                                                       | 0      | 500      | -21559.4458  | -79543.416   | 36424.5245  | True |

| 2-2 comparison (Tukey) – pH condition – <i>P. stuartii</i> ΔOmp-Pst2 |        |             |             |             |        |  |
|----------------------------------------------------------------------|--------|-------------|-------------|-------------|--------|--|
| Omp-Pst1 porin – FCC                                                 |        |             |             |             |        |  |
| 5h:                                                                  |        |             |             |             |        |  |
| Multiple Comparison of Means - Tukey HSD,FWER=0.05                   |        |             |             |             |        |  |
| group1                                                               | group2 | meandiff    | lower       | upper       | reject |  |
| 5                                                                    | 6      | 17463.0878  | -29975.2601 | 64901.4357  | False  |  |
| 5                                                                    | 7      | 61544.038   | 22810.7891  | 100277.2868 | True   |  |
| 5                                                                    | 8      | 31719.0228  | -15719.3251 | 79157.3706  | False  |  |
| 5                                                                    | 9      | 11726.8916  | -35711.4563 | 59165.2394  | False  |  |
| 6                                                                    | 7      | 44080.9502  | 5347.7013   | 82814.199   | True   |  |
| 6                                                                    | 8      | 14255.935   | -33182.4129 | 61694.2828  | False  |  |
| 6                                                                    | 9      | -5736.1962  | -53174.5441 | 41702.1516  | False  |  |
| 7                                                                    | 8      | -29825.0152 | -68558.2641 | 8908.2336   | False  |  |

|   |   |             |             |             |       |
|---|---|-------------|-------------|-------------|-------|
| 7 | 9 | -49817.1464 | -88550.3953 | -11083.8976 | True  |
| 8 | 9 | -19992.1312 | -67430.4791 | 27446.2167  | False |

**7h:**

```

Multiple Comparison of Means - Tukey HSD,FWER=0.05
=====
group1 group2  meandiff      lower      upper    reject
-----
5      6      25669.2245 -61218.4629  112556.9119 False
5      7      82700.2695  11756.7698  153643.7692  True
5      8      12770.8041 -74116.8833   99658.4916 False
5      9     -14547.9893 -101435.6767  72339.6981 False
6      7      57031.045  -13912.4547  127974.5447 False
6      8     -12898.4204 -99786.1078   73989.267  False
6      9     -40217.2138 -127104.9013  46670.4736 False
7      8     -69929.4654 -140872.9651  1014.0343  False
7      9     -97248.2588 -168191.7585 -26304.7591  True
8      9     -27318.7935 -114206.4809  59568.894  False

```

**9h:**

```

Multiple Comparison of Means - Tukey HSD,FWER=0.05
=====
group1 group2  meandiff      lower      upper    reject
-----
5      6      21948.695  -38626.9602   82524.3501 False
5      7      84516.5196  35056.7043  133976.3349  True
5      8      43319.6633 -17255.9918  103895.3184 False
5      9     -22639.6063 -83215.2615   37936.0488 False
6      7      62567.8246  13108.0093  112027.6399  True
6      8      21370.9683 -39204.6868   81946.6235 False
6      9     -44588.3013 -105163.9564  15987.3538 False
7      8     -41196.8563 -90656.6716   8262.959  False
7      9     -107156.1259 -156615.9412 -57696.3107  True
8      9     -65959.2696 -126534.9248 -5383.6145  True

```

**Supplementary Table S3 – Statistical analysis from DLS experiments on porin propensity to self-associate in DOTs.** All experiments were conducted for at least three biologically independent replicates. Technical replicates were averaged to produce replicate means that were subsequently used for analysis. Mean values were compared within and between groups using one-way ANOVA followed by Tukey's post hoc for two-two comparisons. Differences were considered statistically significant if  $p < 0.05$  (True).

### GLM - DLS

#### Omp-Pst1 porin – All statistic parameters:

| Generalized Linear Model Regression Results |                  |                   |           |       |           |          |
|---------------------------------------------|------------------|-------------------|-----------|-------|-----------|----------|
| Dep. Variable:                              | Y                | No. Observations: | 389       |       |           |          |
| Model:                                      | GLM              | Df Residuals:     | 381       |       |           |          |
| Model Family:                               | Gamma            | Df Model:         | 7         |       |           |          |
| Link Function:                              | inverse_power    | Scale:            | 0.097908  |       |           |          |
| Method:                                     | IRLS             | Log-Likelihood:   | -1972.8   |       |           |          |
| Date:                                       | Mon, 18 Mar 2019 | Deviance:         | 33.696    |       |           |          |
| Time:                                       | 14:17:24         | Pearson chi2:     | 37.3      |       |           |          |
| No. Iterations:                             | 7                | Covariance Type:  | nonrobust |       |           |          |
|                                             | coef             | std err           | z         | P> z  | [0.025    | 0.975]   |
| Intercept                                   | 0.0137           | 0.002             | 8.950     | 0.000 | 0.011     | 0.017    |
| Cporin                                      | -0.0130          | 0.002             | -7.730    | 0.000 | -0.016    | -0.010   |
| Urea                                        | 2.3e-07          | 6.93e-07          | 0.332     | 0.740 | -1.13e-06 | 1.59e-06 |
| Cporin:Urea                                 | 7.344e-07        | 8.34e-07          | 0.881     | 0.378 | -9e-07    | 2.37e-06 |
| Ammonium                                    | 3.751e-06        | 9.29e-07          | 4.036     | 0.000 | 1.93e-06  | 5.57e-06 |
| Cporin:Ammonium                             | 4.42e-06         | 1.36e-06          | 3.246     | 0.001 | 1.75e-06  | 7.09e-06 |
| pH                                          | -0.0007          | 0.000             | -3.151    | 0.002 | -0.001    | -0.000   |
| Cporin:pH                                   | 0.0012           | 0.000             | 5.136     | 0.000 | 0.001     | 0.002    |

#### Omp-Pst2 porin – All statistic parameters:

| Generalized Linear Model Regression Results |                  |                   |           |       |           |           |
|---------------------------------------------|------------------|-------------------|-----------|-------|-----------|-----------|
| Dep. Variable:                              | Y                | No. Observations: | 386       |       |           |           |
| Model:                                      | GLM              | Df Residuals:     | 378       |       |           |           |
| Model Family:                               | Gamma            | Df Model:         | 7         |       |           |           |
| Link Function:                              | inverse_power    | Scale:            | 0.36485   |       |           |           |
| Method:                                     | IRLS             | Log-Likelihood:   | -2501.6   |       |           |           |
| Date:                                       | Mon, 18 Mar 2019 | Deviance:         | 123.99    |       |           |           |
| Time:                                       | 14:19:20         | Pearson chi2:     | 138.      |       |           |           |
| No. Iterations:                             | 8                | Covariance Type:  | nonrobust |       |           |           |
|                                             | coef             | std err           | z         | P> z  | [0.025    | 0.975]    |
| Intercept                                   | 0.0066           | 0.001             | 4.551     | 0.000 | 0.004     | 0.010     |
| Cporin                                      | -0.0046          | 0.001             | -3.105    | 0.002 | -0.008    | -0.002    |
| Urea                                        | 4.958e-07        | 6.87e-07          | 0.722     | 0.470 | -8.51e-07 | 1.84e-06  |
| Cporin:Urea                                 | -6.935e-07       | 6.79e-07          | -1.022    | 0.307 | -2.02e-06 | 6.36e-07  |
| Ammonium                                    | 1.284e-05        | 1.92e-06          | 6.681     | 0.000 | 9.07e-06  | 1.66e-05  |
| Cporin:Ammonium                             | -1.208e-05       | 1.82e-06          | -6.651    | 0.000 | -1.56e-05 | -8.52e-06 |
| pH                                          | -0.0003          | 0.000             | -1.475    | 0.140 | -0.001    | 9.77e-05  |
| Cporin:pH                                   | 0.0002           | 0.000             | 1.107     | 0.268 | -0.000    | 0.001     |

#### Omp-Pst1 porin – Bicarbonate – All statistic parameters:

| Generalized Linear Model Regression Results |                  |                   |           |       |           |          |
|---------------------------------------------|------------------|-------------------|-----------|-------|-----------|----------|
| Dep. Variable:                              | Y                | No. Observations: | 96        |       |           |          |
| Model:                                      | GLM              | Df Residuals:     | 92        |       |           |          |
| Model Family:                               | Gamma            | Df Model:         | 3         |       |           |          |
| Link Function:                              | inverse_power    | Scale:            | 0.0066722 |       |           |          |
| Method:                                     | IRLS             | Log-Likelihood:   | -380.86   |       |           |          |
| Date:                                       | Sat, 20 Apr 2019 | Deviance:         | 0.62057   |       |           |          |
| Time:                                       | 11:22:54         | Pearson chi2:     | 0.614     |       |           |          |
| No. Iterations:                             | 7                | Covariance Type:  | nonrobust |       |           |          |
|                                             | coef             | std err           | z         | P> z  | [0.025    | 0.975]   |
| Intercept                                   | 0.0129           | 0.000             | 60.130    | 0.000 | 0.012     | 0.013    |
| Bicarbonate                                 | 2.458e-06        | 4.09e-06          | 0.601     | 0.548 | -5.56e-06 | 1.05e-05 |
| Concentration                               | -0.0109          | 0.000             | -50.047   | 0.000 | -0.011    | -0.010   |



|                                             |                  |                   |           |       |          |          |
|---------------------------------------------|------------------|-------------------|-----------|-------|----------|----------|
| Bicarbonate:Concentration                   | 1.985e-05        | 4.23e-06          | 4.691     | 0.000 | 1.16e-05 | 2.81e-05 |
| =====                                       |                  |                   |           |       |          |          |
| <b>Omp-Pst1 porin – Bicarbonate:</b>        |                  |                   |           |       |          |          |
| Generalized Linear Model Regression Results |                  |                   |           |       |          |          |
| =====                                       |                  |                   |           |       |          |          |
| Dep. Variable:                              | Y                | No. Observations: | 96        |       |          |          |
| Model:                                      | GLM              | Df Residuals:     | 94        |       |          |          |
| Model Family:                               | Gamma            | Df Model:         | 1         |       |          |          |
| Link Function:                              | inverse_power    | Scale:            | 0.49076   |       |          |          |
| Method:                                     | IRLS             | Log-Likelihood:   | -601.92   |       |          |          |
| Date:                                       | Sat, 20 Apr 2019 | Deviance:         | 56.351    |       |          |          |
| Time:                                       | 11:23:18         | Pearson chi2:     | 46.1      |       |          |          |
| No. Iterations:                             | 7                | Covariance Type:  | nonrobust |       |          |          |
| =====                                       |                  |                   |           |       |          |          |
|                                             | coef             | std err           | z         | P> z  | [0.025   | 0.975]   |
| -----                                       |                  |                   |           |       |          |          |
| Intercept                                   | 0.0037           | 0.000             | 8.701     | 0.000 | 0.003    | 0.005    |
| Bicarbonate                                 | 2.78e-05         | 1.06e-05          | 2.634     | 0.008 | 7.11e-06 | 4.85e-05 |
| =====                                       |                  |                   |           |       |          |          |

|                                                                 |                  |                   |           |       |          |          |
|-----------------------------------------------------------------|------------------|-------------------|-----------|-------|----------|----------|
| <b>Omp-Pst2 porin – Bicarbonate – All statistic parameters:</b> |                  |                   |           |       |          |          |
| Generalized Linear Model Regression Results                     |                  |                   |           |       |          |          |
| =====                                                           |                  |                   |           |       |          |          |
| Dep. Variable:                                                  | Y                | No. Observations: | 50        |       |          |          |
| Model:                                                          | GLM              | Df Residuals:     | 48        |       |          |          |
| Model Family:                                                   | Gamma            | Df Model:         | 1         |       |          |          |
| Link Function:                                                  | inverse_power    | Scale:            | 0.016299  |       |          |          |
| Method:                                                         | IRLS             | Log-Likelihood:   | -246.36   |       |          |          |
| Date:                                                           | Sat, 20 Apr 2019 | Deviance:         | 0.76802   |       |          |          |
| Time:                                                           | 11:34:22         | Pearson chi2:     | 0.782     |       |          |          |
| No. Iterations:                                                 | 18               | Covariance Type:  | nonrobust |       |          |          |
| =====                                                           |                  |                   |           |       |          |          |
|                                                                 | coef             | std err           | z         | P> z  | [0.025   | 0.975]   |
| -----                                                           |                  |                   |           |       |          |          |
| Intercept                                                       | 0.0013           | 3.89e-05          | 33.427    | 0.000 | 0.001    | 0.001    |
| Bicarbonate                                                     | 1.703e-05        | 1.17e-06          | 14.569    | 0.000 | 1.47e-05 | 1.93e-05 |
| Concentration                                                   | 0.0013           | 3.89e-05          | 33.427    | 0.000 | 0.001    | 0.001    |
| Bicarbonate:Concentration                                       | 1.703e-05        | 1.17e-06          | 14.569    | 0.000 | 1.47e-05 | 1.93e-05 |
| =====                                                           |                  |                   |           |       |          |          |

|                                             |                  |                   |           |       |          |          |
|---------------------------------------------|------------------|-------------------|-----------|-------|----------|----------|
| <b>Omp-Pst2 porin – Bicarbonate:</b>        |                  |                   |           |       |          |          |
| Generalized Linear Model Regression Results |                  |                   |           |       |          |          |
| =====                                       |                  |                   |           |       |          |          |
| Dep. Variable:                              | Y                | No. Observations: | 50        |       |          |          |
| Model:                                      | GLM              | Df Residuals:     | 48        |       |          |          |
| Model Family:                               | Gamma            | Df Model:         | 1         |       |          |          |
| Link Function:                              | inverse_power    | Scale:            | 0.016299  |       |          |          |
| Method:                                     | IRLS             | Log-Likelihood:   | -246.36   |       |          |          |
| Date:                                       | Sat, 20 Apr 2019 | Deviance:         | 0.76802   |       |          |          |
| Time:                                       | 11:35:15         | Pearson chi2:     | 0.782     |       |          |          |
| No. Iterations:                             | 6                | Covariance Type:  | nonrobust |       |          |          |
| =====                                       |                  |                   |           |       |          |          |
|                                             | coef             | std err           | z         | P> z  | [0.025   | 0.975]   |
| -----                                       |                  |                   |           |       |          |          |
| Intercept                                   | 0.0026           | 7.79e-05          | 33.427    | 0.000 | 0.002    | 0.003    |
| Bicarbonate                                 | 3.405e-05        | 2.34e-06          | 14.569    | 0.000 | 2.95e-05 | 3.86e-05 |
| =====                                       |                  |                   |           |       |          |          |

|                                                    |        |          |           |           |        |  |
|----------------------------------------------------|--------|----------|-----------|-----------|--------|--|
| <b>2-2 comparison (Tukey) – Ammonia condition</b>  |        |          |           |           |        |  |
| <b>Omp-Pst1 porin</b>                              |        |          |           |           |        |  |
| Multiple Comparison of Means - Tukey HSD,FWER=0.05 |        |          |           |           |        |  |
| =====                                              |        |          |           |           |        |  |
| group1                                             | group2 | meandiff | lower     | upper     | reject |  |
| -----                                              |        |          |           |           |        |  |
| 0                                                  | 100    | -226.57  | -347.8389 | -105.3011 | True   |  |
| 0                                                  | 500    | -207.49  | -328.7589 | -86.2211  | True   |  |
| 0                                                  | 1000   | -230.26  | -351.5289 | -108.9911 | True   |  |
| 100                                                | 500    | 19.08    | -120.9493 | 159.1093  | False  |  |
| 100                                                | 1000   | -3.69    | -143.7193 | 136.3393  | False  |  |

|                                                       |        |          |           |           |        |
|-------------------------------------------------------|--------|----------|-----------|-----------|--------|
| 500                                                   | 1000   | -22.77   | -162.7993 | 117.2593  | False  |
| <b>Omp-Pst2 porin</b>                                 |        |          |           |           |        |
| Multiple Comparison of Means - Tukey HSD,FWER=0.05    |        |          |           |           |        |
| group1                                                | group2 | meandiff | lower     | upper     | reject |
| 0                                                     | 100    | 98.33    | 2.99      | 193.67    | True   |
| 0                                                     | 500    | 193.62   | 98.28     | 288.96    | True   |
| 0                                                     | 1000   | 308.39   | 205.411   | 411.369   | True   |
| 100                                                   | 500    | 95.29    | -14.7991  | 205.3791  | False  |
| 100                                                   | 1000   | 210.06   | 93.2928   | 326.8272  | True   |
| 500                                                   | 1000   | 114.77   | -1.9972   | 231.5372  | False  |
| <b>2-2 comparison (Tukey) – Bicarbonate condition</b> |        |          |           |           |        |
| <b>Omp-Pst1 porin</b>                                 |        |          |           |           |        |
| Multiple Comparison of Means - Tukey HSD,FWER=0.05    |        |          |           |           |        |
| group1                                                | group2 | meandiff | lower     | upper     | reject |
| 0                                                     | 10     | -57.92   | -125.4145 | 9.5745    | False  |
| 0                                                     | 25     | -71.63   | -126.739  | -16.521   | True   |
| 0                                                     | 50     | -185.4   | -240.509  | -130.291  | True   |
| 0                                                     | 100    | -260.72  | -315.829  | -205.611  | True   |
| 10                                                    | 25     | -13.71   | -81.2045  | 53.7845   | False  |
| 10                                                    | 50     | -127.48  | -194.9745 | -59.9855  | True   |
| 10                                                    | 100    | -202.8   | -270.2945 | -135.3055 | True   |
| 25                                                    | 50     | -113.77  | -168.879  | -58.661   | True   |
| 25                                                    | 100    | -189.09  | -244.199  | -133.981  | True   |
| 50                                                    | 100    | -75.32   | -130.429  | -20.211   | True   |
| <b>Omp-Pst2 porin</b>                                 |        |          |           |           |        |
| Multiple Comparison of Means - Tukey HSD,FWER=0.05    |        |          |           |           |        |
| group1                                                | group2 | meandiff | lower     | upper     | reject |
| 0                                                     | 10     | -116.89  | -151.1648 | -82.6152  | True   |
| 0                                                     | 25     | -139.98  | -174.2548 | -105.7052 | True   |
| 0                                                     | 50     | -221.96  | -256.2348 | -187.6852 | True   |
| 0                                                     | 100    | -242.87  | -277.1448 | -208.5952 | True   |
| 10                                                    | 25     | -23.09   | -57.3648  | 11.1848   | False  |
| 10                                                    | 50     | -105.07  | -139.3448 | -70.7952  | True   |
| 10                                                    | 100    | -125.98  | -160.2548 | -91.7052  | True   |
| 25                                                    | 50     | -81.98   | -116.2548 | -47.7052  | True   |
| 25                                                    | 100    | -102.89  | -137.1648 | -68.6152  | True   |
| 50                                                    | 100    | -20.91   | -55.1848  | 13.3648   | True   |
| <b>2-2 comparison (Tukey) – pH condition</b>          |        |          |           |           |        |
| <b>Omp-Pst1 porin</b>                                 |        |          |           |           |        |
| Multiple Comparison of Means - Tukey HSD,FWER=0.05    |        |          |           |           |        |
| group1                                                | group2 | meandiff | lower     | upper     | reject |
| 5                                                     | 6      | -110.6   | -137.2876 | -83.9124  | True   |
| 5                                                     | 7      | 14.73    | -11.9576  | 41.4176   | False  |
| 5                                                     | 8      | -192.42  | -219.1076 | -165.7324 | True   |
| 5                                                     | 9      | -165.36  | -192.0476 | -138.6724 | True   |
| 6                                                     | 7      | 125.33   | 98.6424   | 152.0176  | True   |
| 6                                                     | 8      | -81.82   | -108.5076 | -55.1324  | True   |
| 6                                                     | 9      | -54.76   | -81.4476  | -28.0724  | True   |
| 7                                                     | 8      | -207.15  | -233.8376 | -180.4624 | True   |
| 7                                                     | 9      | -180.09  | -206.7776 | -153.4024 | True   |
| 8                                                     | 9      | 27.06    | 0.3724    | 53.7476   | True   |
